# Supplementary material for: The Effect of Stimulus Size and Eccentricity on Attention Shift Latencies
Source: Vision (Basel). 2017 Dec 7;1(4):25. doi: 10.3390/vision1040025 (PMC6835991; doi:10.3390/vision1040025)
Supplement: Supplementary file 1 [file vision-01-00025-s001.xlsx]

## Sheet: MeanData
SubjectID	age	MeanSaccadeLatencySmallEcc5	MeanSaccadeLatencyLargeEcc5	MeanSaccadeLatencySmallEcc13	MeanSaccadeLatencyLargeEcc13
1	18	0.331747	0.394132	0.335985	0.289419
2	22	0.276153	0.268976	0.290141	0.262587
3	20	0.250292	0.302353	0.268317	0.286967
4	20	0.280849	0.251939	0.301156	0.238633
5	22	0.345565	0.310001	0.352421	0.350897
6	22	0.247878	0.310358	0.276021	0.279252
7	20	0.195761	0.248201	0.209976	0.219504
8	19	0.358707	0.312022	0.305645	0.353872
9	19	0.278176	0.269946	0.232807	0.208113
10	19	0.282537	0.322504	0.294295	0.281503
11	19	0.259333	0.254053	0.290525	0.262832
12	21	0.218466	0.221846	0.262139	0.20935
13	24	0.260526	0.278941	0.287596	0.254333
14	20	0.190216	0.215794	0.214855	0.194967
15	20	0.339533	0.381223	0.267197	0.285943
16	20	0.298584	0.2755	0.283471	0.248254
17	19	0.300825	0.304783	0.27535	0.287852
18	20	0.282778	0.371169	0.272074	0.272087
19	19	0.211551	0.260068	0.198992	0.177123
20	20	0.211347	0.254985	0.252242	0.238412
21	19	0.214981	0.221974	0.257736	0.231006
22	20	0.354152	0.352236	0.310179	0.301505

## Sheet: SeparateDataForScreenside
SubjectID	age	ScreenSide	SaccadeLatencySmallEcc5	SaccadeLatencyLargeEcc5	SaccadeLatencySmallEcc13	SaccadeLatencyLargeEcc13
1	18	1	0.391139	0.532925	0.314941	0.266474
1	18	2	0.272355	0.255339	0.357028	0.312363
2	22	1	0.270926	0.273282	0.278278	0.249064
2	22	2	0.281381	0.26467	0.302004	0.27611
3	20	1	0.253244	0.344191	0.268266	0.275861
3	20	2	0.247341	0.260514	0.268367	0.298072
4	20	1	0.284536	0.252838	0.268851	0.229197
4	20	2	0.277162	0.251039	0.333461	0.248069
5	22	1	0.341758	0.308701	0.331575	0.361353
5	22	2	0.349372	0.311302	0.373267	0.340441
6	22	1	0.253987	0.324291	0.261314	0.27029
6	22	2	0.241768	0.296426	0.290728	0.288214
7	20	1	0.189445	0.224847	0.189324	0.208178
7	20	2	0.202077	0.271555	0.230627	0.230831
8	19	1	0.362903	0.299254	0.291459	0.369114
8	19	2	0.354511	0.324789	0.319831	0.33863
9	19	1	0.314872	0.261124	0.238243	0.207054
9	19	2	0.24148	0.278769	0.227371	0.209172
10	19	1	0.290493	0.363541	0.301817	0.287286
10	19	2	0.274582	0.281467	0.286773	0.27572
11	19	1	0.259124	0.267914	0.267875	0.272373
11	19	2	0.259542	0.240193	0.313176	0.253291
12	21	1	0.227618	0.216858	0.24781	0.20519
12	21	2	0.209314	0.226833	0.276468	0.213511
13	24	1	0.28233	0.282354	0.310197	0.245814
13	24	2	0.238721	0.275528	0.264995	0.262851
14	20	1	0.195001	0.248368	0.201737	0.190077
14	20	2	0.185431	0.18322	0.227973	0.199857
15	20	1	0.330595	0.425159	0.28893	0.303603
15	20	2	0.348471	0.337287	0.245465	0.268283
16	20	1	0.299377	0.281165	0.268644	0.231112
16	20	2	0.29779	0.269834	0.298298	0.265397
17	19	1	0.293544	0.296186	0.271135	0.289563
17	19	2	0.308106	0.31338	0.279564	0.286141
18	20	1	0.312286	0.46475	0.264298	0.285828
18	20	2	0.25327	0.277589	0.27985	0.258346
19	19	1	0.241928	0.250864	0.212846	0.176824
19	19	2	0.181174	0.269271	0.185138	0.177423
20	20	1	0.196332	0.252127	0.236203	0.240764
20	20	2	0.226363	0.257844	0.268281	0.23606
21	19	1	0.207509	0.228837	0.264296	0.237701
21	19	2	0.222453	0.215111	0.251175	0.22431
22	20	1	0.268516	0.36997	0.268279	0.29012
22	20	2	0.439788	0.334502	0.352079	0.312891
